25 **ABSTRACT**

26 Electronic health records (EHRs) contain rich temporal data about infectious diseases, but an  
27 optimal approach to identify infections remains undefined. Using the *All of Us* Research  
28 Program, we developed computable phenotypes for respiratory viruses by integrating billing  
29 codes, prescriptions, and laboratory results within 90-day episodes. Phenotypes computed from  
30 265,222 participants yielded cohorts ranging from 238 (adenovirus) to 28,729 (SARS-CoV-2)  
31 cases. Virus-specific billing codes showed varied sensitivity (8-67%) and high positive predictive  
32 value (90-97%), except for influenza virus and SARS-CoV-2 where lower PPV (69-70%)  
33 improved with increasing billing codes. Identified infections exhibited expected seasonal  
34 patterns and virus proportions when compared with CDC data. This integrated approach  
35 identified episodic disease more effectively than individual components alone and demonstrated  
36 utility in identifying severe infections. The method enables large-scale studies of host genetics,  
37 health disparities, and clinical outcomes across episodic diseases.

## 38 INTRODUCTION

39 Respiratory infections are among the most common human diseases. Severity is influenced by  
40 demographics, social determinants of health, comorbidities, immunosuppression, lifestyle,  
41 exposures, and genetic factors.<sup>1</sup> Influenza virus, respiratory syncytial virus (RSV), and SARS-  
42 CoV-2 are well-studied causes of lower respiratory tract infections, but over 25 known viruses  
43 can cause such disease.<sup>2</sup> The advent of multiplex testing has revealed that rhinovirus (RV),  
44 human metapneumovirus (hMPV), parainfluenza viruses (PIV), and common human  
45 coronaviruses (hCoVs) can cause similar symptoms, detection rates, morbidity, mortality, and  
46 healthcare costs in hospitalized patients.<sup>3-5</sup>

47  
48 Risk factors for severe infection by influenza virus, RSV, and SARS-CoV-2 are well  
49 characterized. These include age extremes, immunosuppression, male sex, smoking, and  
50 comorbidities such as obesity, chronic lung disease, hypertension, diabetes, and heart  
51 failure.<sup>1,6-8</sup> Similarly, population-level genetic risk factors have been identified through genome-  
52 wide studies for SARS-CoV-2, avian influenza virus (H7N9), pandemic influenza virus  
53 (H1N1<sub>pdm09</sub>), and influenza virus by survey report.<sup>9-14</sup> While underrecognized viruses share  
54 similar risk factors like advanced age and immunocompromised status, they remain  
55 understudied.<sup>3,4,15,16</sup>

56  
57 Population-level studies of respiratory infections typically rely on administrative claims data,  
58 laboratory surveillance data, or curated clinical cohorts.<sup>15,17</sup> While laboratory results and some  
59 pathogen-specific billing codes are highly specific, they have poor sensitivity due to infrequent  
60 testing, and adding non-specific International Classification of Diseases (ICD) codes only  
61 modestly improves sensitivity.<sup>18,19</sup> In contrast, electronic health record (EHR)-based  
62 phenotyping algorithms can integrate multiple data types to reliably identify disease cohorts for  
63 observational studies. Although integrating billing codes, clinical notes, and medications in

64 disease phenotyping using EHRs improves performance, this approach has only rarely been  
65 used for respiratory viruses.<sup>15,20–23</sup>

66  
67 This study aimed to create and assess a computable phenotype for identifying viral respiratory  
68 infections in EHR data using the National Institutes of Health’s *All of Us* Research Program (*All*  
69 *of Us*). We evaluated ICD billing codes, medications, and laboratory results to identify infections,  
70 and assessed phenotype performance through specificity, positive predictive value (PPV) and  
71 sensitivity calculations compared to gold-standard laboratory testing; and compared the  
72 frequency and distribution of laboratory results against CDC surveillance data.

73

## 74 **MATERIALS AND METHODS**

### 75 **Data Acquisition**

76 We analyzed data from the *All of Us* Research Program, which digitally enrolls participants aged  
77 18 years and older across the United States.<sup>24</sup> *All of Us* is a large, diverse national cohort where  
78 participants contribute survey data, standardized physical measurements, biospecimens, and  
79 EHR data including billing codes, prescriptions, and laboratory results [23]. Participants provide  
80 consent to share health information, which includes physical measurements, surveys, genomic  
81 data, and EHRs. The informed consent and enrollment process has been described, and  
82 specific Institutional Review Board approval is not required for Controlled Tier use of de-  
83 identified data, deemed nonhuman subjects research by the *All of Us* Institutional Review  
84 Board.<sup>24,25</sup> The program prioritizes recruitment of populations historically underrepresented in  
85 biomedical research.<sup>24</sup> This analysis used Controlled Tier data (C2022Q4R13) from the *All of Us*  
86 Researcher Workbench and was restricted to the 265,222 participants who had ICD codes,  
87 medications, or laboratory results in their EHR data between 1/1/1981 and 7/1/2022. Data  
88 linkage, follow-up completeness, quality assessment, privacy, and community engagement are

89 described in the *All of Us* Protocol.<sup>26</sup> This study meets all five of the CODE-EHR minimum  
90 framework standards for the use of structured health care data in clinical research, with one out  
91 of five standards meeting preferred criteria.<sup>27</sup> Participants' demographic data were derived from  
92 the *All of Us* Researcher Workspace's "person" table and its "The Basics" survey.

93

## 94 **Phenotype Development**

95 We developed computable phenotypes for eight respiratory viruses: rhinovirus (RV); human  
96 metapneumovirus (hMPV); respiratory syncytial virus (RSV); adenovirus (ADV); SARS-CoV-2,  
97 parainfluenza (PIV); common human coronavirus (hCoV); and influenza virus. Patient  
98 encounters were identified in the EHR if they had at least one of the following: a virus-specific  
99 billing code (ICD-9-CM or ICD-10-CM), an antiviral indicated for the target pathogen, or a  
100 positive laboratory test. We identified virus-specific billing codes and Logical Observation  
101 Identifiers Names and Codes (LOINC) laboratory results by searching for the virus name and  
102 related terms (*e.g.*, "adenovirus" and "adenoviral pneumonia"). We excluded codes and results  
103 for zoonotic infections, vaccine-related events, and ICD codes for explicitly non-respiratory  
104 conditions (*e.g.*, "ovine adenovirus", "enteritis due to adenovirus"). We also excluded codes and  
105 results for pathogens sharing components of the virus name (*e.g.*, "Haemophilus influenzae").  
106 Laboratory data included nucleic acid amplification, antigen, and culture results. For influenza  
107 virus and SARS-CoV-2, we included antiviral medications (*i.e.*, oseltamivir, zanamivir, and  
108 baloxavir for influenza virus; remdesivir, molnupiravir, and nirmatrelvir/ritonavir for SARS-CoV-2)  
109 given for more than one day. For oseltamivir and zanamivir, prescriptions were removed if the  
110 duration of treatment was greater than 6 days to exclude prophylaxis. Antivirals for other  
111 respiratory viruses were not included due to poor specificity or their reserved use for severe or  
112 immunocompromised cases (Figure 1A).

113

114 We computed phenotypes for each infection episode by grouping related clinical events (Figure  
115 1A). An episode began with the first occurrence ( $t_0$ ) of any virus-specific component: a virus-  
116 specific ICD code, positive laboratory result, or qualifying antiviral prescription. All subsequent  
117 components within 90 days of  $t_0$  were considered part of the same episode, while events  
118 beyond 90 days initiated new episodes.<sup>15</sup> To capture false negatives, we included negative or  
119 indeterminate laboratory results from  $t_0$ -5 days through the episode's end. The per-episode  
120 occurrence of constituent components (ICD codes, positive laboratory results, and medications)  
121 were tallied (Figure 1B). Counts for all virus-specific ICD codes, laboratory results, and  
122 medications used for phenotyping are provided (Tables S1-3). We de-duplicated row-level  
123 entries; categorized visit types into major categories (*i.e.*, intensive care unit, inpatient,  
124 emergency room, urgent care, post-acute care, outpatient, and unknown); and reclassified  
125 laboratory results as positive, negative, or indeterminate (Table S4).

126

## 127 **Phenotype Sensitivity Analyses**

### 128 *Positive Predictive Value, Specificity, and Sensitivity Calculations*

129 Using non-antigen test results as reference standard, we calculated the performance (PPV,  
130 sensitivity, and specificity) based on increasing counts of virus-specific ICD codes within each  
131 episode (*e.g.*, multiple occurrences of J10.1, or combinations like J10.1 + J11 + 487). For a  
132 given threshold  $N$  ( $n = 0$ ,  $n \geq 1$ ,  $n \geq 2$ ,  $n \geq 3$ ,  $n \geq 4$ ), we defined true positives as episodes with  $N$   
133 virus-specific ICD codes and a positive test, false positives as episodes with  $N$  ICD codes and  
134 only negative tests, and false negatives as episodes with fewer than  $N$  ICD codes and a positive  
135 test.

136

137 For influenza virus and SARS-CoV-2, we additionally tested the performance of incorporating  
138 antiviral prescriptions. We first assessed specificity, sensitivity, and PPV in cases requiring both

139 the specified ICD count and a prescription to be considered positive, or fewer than  $N$  ICD codes  
140 and no prescription to be considered negative. Then, we evaluated full performance metrics  
141 (sensitivity, specificity, PPV, negative predictive value (NPV), and phi coefficient) across  
142 different combinations of ICD code thresholds and medication criteria for these two viruses.

143

#### 144 *Temporal and Geographic Analysis of Phenotype-Positive Episodes*

145 For any episode that met positivity criteria, we analyzed temporal patterns by calculating three-  
146 week moving averages of episode and constituent component counts from July 2017 (MMWR  
147 week 201726) through June 2022 (MMWR week 202225). Because hCoV PPV was lower than  
148 expected for non-influenza, non-SARS-CoV-2 viruses, and as hCoV ICD counts were disrupted  
149 during the COVID-19 pandemic, hCoV ICD codes after February 1, 2020 were excluded from  
150 the analysis (Figure S3). We assessed the geographic distribution of episode rates by three-  
151 digit ZIP code prefixes (zip3).

152

#### 153 *Level of Care Sensitivity Analysis*

154 Because of differences in testing and care by facility type and acuity, for each episode we  
155 identified the highest acuity encounter (from lowest to highest: outpatient, post-acute care,  
156 urgent care, emergency department, or inpatient) within a window spanning  $t_0-7$  days through  
157  $t_0+14$  days. We chose this window after analyzing the distributions of visit timing for phenotype-  
158 related visits (those associated with virus-specific ICD codes, antivirals, or laboratory results)  
159 and all visits (Figure S4). Use of all visits within the selected window, rather than only  
160 phenotype-related visits, reduced the overall percentage of missing encounter data from 25.9%  
161 to 15.4%; across viruses and ICD counts, median missing encounter data decreased from  
162 17.6% (IQR 7.6-28.3%) to 11.3% (IQR 2.2-17.8%) (Table S5). Rarely (0.09%-0.43%),  
163 phenotype-related maximum encounter acuity exceeded encounters within this time window  
164 (e.g., hospitalization occurring >7 days prior to initial viral diagnosis, Figure S5). For PIV, hMPV,

165 and RSV, manual review of these visits revealed that the associated encounter start date  
166 preceded the window period by a few days, and the phenotype component level of care was  
167 retained. We analyzed level-of-care patterns across viruses, stratifying by ICD codes and test  
168 positivity.

169

## 170 **Comparison with National Surveillance Data**

171 To understand the representativeness of respiratory illness data in *All of Us*, we compared the  
172 seasonal percent positivity and test volume of *All of Us* EHR laboratory results to data from  
173 three CDC/WHO sources: National Respiratory and Enteric Virus Surveillance System  
174 (NREVSS), COVID-19 Data Tracker, and the Global Influenza Surveillance and Response  
175 System (GISRS).

176

177 First, we assessed geographic coverage by comparing *All of Us* participant locations and testing  
178 rates to deduplicated NREVSS clinical laboratory results from 2017-2021.<sup>28</sup> *All of Us* EHR  
179 participant counts were visualized by aggregating data across three-digit ZIP code prefixes  
180 (zip3). Zip3 information was missing for 2/265,222 (0.00%). *All of Us* EHR participants (per  
181 1,000 zip3 2020 Census population) and *All of Us* participants tested (per 1,000 *All of Us*  
182 participants with EHR data) were similarly aggregated by zip3 code. Zip3 regions with five or  
183 fewer *All of Us* participants were removed and classified as “No Data.” We obtained zip3  
184 boundaries from US Census Bureau zip code tabulation areas, 2017 cartographic state  
185 boundaries from the Vega us-10m.json dataset, and 2020 zip code tabulation area populations  
186 from the US Census Bureau.

187

188 Next, we assessed virus distribution by comparing proportions detected ( $\% = N \text{ type} / N \text{ total}$   
189 with known type) in *All of Us* to surveillance data from NREVSS and the GISRS.<sup>29–31</sup> These



190 comparisons were limited to hCoV, influenza virus, and PIV, as these were the only viruses for  
191 which syndromic multiplex panels routinely report type-specific results.

192  
193 To evaluate temporal patterns, we compared weekly test positivity data between *All of Us* and  
194 CDC surveillance from the first week of July, 2016 to the last week of June, 2022. For each  
195 virus, we calculated the percentage of positive tests for each *MMWR* reporting week. We plotted  
196 three-week moving averages for both percent positivity and total tests performed for *All of Us*  
197 and CDC data. We obtained CDC comparison data from NREVSS for non-SARS-CoV-2  
198 viruses, additional influenza virus data from FluView, and SARS-CoV-2 data from the COVID  
199 Data Tracker.<sup>28,32,33</sup>

200

## 201 **RESULTS**

### 202 **Cohort Characteristics**

203 Among 265,222 *All of Us* participants with ICD codes, medication entries, or laboratory results  
204 recorded between 1/1/1981 and 7/1/2022, we identified respiratory virus episodes that varied  
205 substantially in duration and composition (Figure 1B). SARS-CoV-2 (n [distinct  
206 episodes]=28,729) and influenza virus (n=19,784) were the largest cohorts, followed by RV  
207 (n=1,620), hCoV (n=1,437), and RSV (n=1,161) and the smallest cohorts, hMPV (n=486), PIV  
208 (n=400), and ADV (n=238).

209

210 Across all cohorts, participants were predominantly female (61-68%) with median ages mostly  
211 between 50 and 58 (Table S6). Participants who self-reported as White were the plurality for  
212 every virus (32.9-60.1%), compared to participants self-reporting as Black (16.5-28.5%) or  
213 Hispanic/Latino (17-32.1%). All other options (Asian, multiple selected, Middle Eastern or North  
214 African, and Native Hawaiian or Other Pacific Islander) were rare (0-2.2%). SARS-CoV-2 and  
215 influenza virus participant demographics most closely mirrored the overall *All of Us* cohort with

216 ICD, laboratory, or medication data. These two groups more frequently self-reported as White  
217 (50.4-60.1%) and were more frequently employed with higher reported income, education, and  
218 employer-provided insurance. Demographic data were only notably missing for insurance type  
219 (46,487/265,222=17.5% for all participants with EHR data). Test count per person was higher  
220 among infected cohorts than tested cohorts for each virus.

221  
222 Episodes commonly consisted of either laboratory results alone (predominant for RV [74.7%],  
223 PIV [65.0%], SARS-CoV-2 [31.3%], hMPV [32.9%]) or single ICD codes (predominant for ADV  
224 [45.8%], hCoV [43.1%], RSV [35.4%], influenza [34.8%]) (Figure 1B). Antiviral use varied  
225 markedly: SARS-CoV-2 episodes rarely included antiviral prescriptions (4.57%), while  
226 medication-only episodes were frequently observed for influenza virus (22.9%), even after  
227 excluding prophylactic prescriptions.

228

### 229 **Phenotype Performance for Detecting True Positives**

230 To understand the diagnostic performance of varying ICD codes for an episode, we calculated  
231 sensitivity, specificity, and PPV for each virus across  $N$  ICD codes per episode using non-  
232 antigen test results as a reference standard (Figure 2). The sensitivity of using one or more ICD  
233 codes varied between viruses and decreased as the minimum  $N$  ICD codes increased.

234 Diagnoses using one or more ICD codes for influenza virus had the highest sensitivity (66.8%),  
235 compared to moderate sensitivity for RSV (55.2%), SARS-CoV-2 (44.8%), ADV (42.4%), hMPV  
236 (40.2%), and hCoV (33.4%), and minimal sensitivity for RV (9.2%) and PIV (8.3%).

237

238 Specificity and PPV demonstrated similar patterns, with exaggerated variation in PPV initially  
239 demonstrating three groupings. First, for influenza virus and SARS-CoV-2, the PPV for one or  
240 more ICD codes was lower (69.7% and 68.8%, respectively), but increased as minimum  $N$  ICD  
241 count increased (78.1% and 76.7% for at least 2 ICD codes, respectively) (Figure 2). Second,

242 for non-influenza, non-SARS-CoV-2 viruses, the PPV was high and did not change substantially  
243 as ICD count increased (89.7-97.3%). Third, hCoV initially demonstrated a high PPV (79.5%)  
244 that decreased as ICD count increased (71.8% for at least 2 ICD codes) (Figure S3A).

245  
246 During the COVID-19 pandemic, hCoV ICD code counts spiked above historical maxima despite  
247 an absence of positive tests (Figure S3B). After removing hCoV ICD codes after February 1,  
248 2020, the PPV trend for common hCoV became similar to other non-influenza, non-SARS-CoV-  
249 2 viruses (Figure 2, Figure S3A).

250  
251 Adding medication use to the phenotype had varying effects on performance. As with the  
252 medication-exclusive phenotypes, specificity and PPV increased with each additional ICD code  
253 for the medication-inclusive influenza and SARS-CoV-2 cohorts. While only a small proportion  
254 (1,345/28,741=4.67%) of SARS-CoV-2 episodes included a prescription for remdesivir,  
255 molnupiravir or nirmatrelvir, the addition of medication to the phenotype did increase PPV for  
256 this subset of 1,345 participants (Figure 2). For influenza virus, medication use alone was poorly  
257 predictive (PPV=46.8%), but combining medications with 1 ICD code improved PPV compared  
258 to 1 or more codes alone (87.1% vs. 69.7%, respectively) (Figure 2).

259  
260 Varying ICD code thresholds and antiviral requirements in the entire influenza and SARS-CoV-2  
261 cohorts demonstrated an expected trade-off in performance (Table 1). For both viruses, at least  
262 one ICD code or medication was the most sensitive phenotype (76.0% influenza virus and  
263 45.1% SARS-CoV-2), but this caused the highest number of false positives and the lowest  
264 PPVs (65.8% and 68.8%, respectively). For influenza virus, by requiring at least two ICD codes  
265 or a medication accompanied by an ICD code, the lower sensitivity (47.7%) was accompanied  
266 by a marked reduction in false positives (778 to 238) and increase in PPV (65.8% to 79.8%).

267 Similar trends were observed for SARS-CoV-2, and despite trade-offs, the phi coefficient was  
 268 highest for the broadest phenotypes.  
 269

**Table 1 Phenotype Performance**

|       | Phenotype                          | TP   | Counts (N) |       |        | Phenotype Performance |       |       |       |        |
|-------|------------------------------------|------|------------|-------|--------|-----------------------|-------|-------|-------|--------|
|       |                                    |      | FP         | FN    | TN     | Sen.                  | Spec. | PPV   | NPV   | $\phi$ |
| Flu   | 1+ ICDs or medication              | 1496 | 778        | 472   | 32018  | 0.760                 | 0.976 | 0.658 | 0.985 | 0.688  |
|       | 1+ ICDs                            | 1315 | 572        | 653   | 32224  | 0.668                 | 0.983 | 0.697 | 0.980 | 0.664  |
|       | 2+ ICDs or medication              | 1120 | 444        | 848   | 32352  | 0.569                 | 0.986 | 0.716 | 0.974 | 0.619  |
|       | 2+ ICDs or (1 ICD + medication)    | 939  | 238        | 1029  | 32558  | 0.477                 | 0.993 | 0.798 | 0.969 | 0.600  |
|       | 3+ ICDs or medication              | 941  | 339        | 1027  | 32457  | 0.478                 | 0.990 | 0.735 | 0.969 | 0.574  |
|       | 3+ ICDs or (1-2 ICDs + medication) | 760  | 133        | 1208  | 32663  | 0.386                 | 0.996 | 0.851 | 0.964 | 0.558  |
|       | 2+ ICDs                            | 691  | 194        | 1277  | 32602  | 0.351                 | 0.994 | 0.781 | 0.962 | 0.506  |
|       | 3+ ICDs                            | 360  | 68         | 1608  | 32728  | 0.183                 | 0.998 | 0.841 | 0.953 | 0.379  |
|       | 1+ ICDs or medication              | 7298 | 3302       | 8894  | 177219 | 0.451                 | 0.982 | 0.688 | 0.952 | 0.526  |
|       | 1+ ICDs                            | 7258 | 3298       | 8934  | 177223 | 0.448                 | 0.982 | 0.688 | 0.952 | 0.524  |
| COVID | 2+ ICDs or medication              | 4483 | 1324       | 11709 | 179197 | 0.277                 | 0.993 | 0.772 | 0.939 | 0.438  |
|       | 2+ ICDs or (1 ICD + medication)    | 4443 | 1320       | 11749 | 179201 | 0.274                 | 0.993 | 0.771 | 0.938 | 0.435  |
|       | 3+ ICDs or medication              | 2598 | 546        | 13594 | 179975 | 0.160                 | 0.997 | 0.826 | 0.930 | 0.345  |
|       | 3+ ICDs or (1-2 ICDs + medication) | 2558 | 542        | 13634 | 179979 | 0.158                 | 0.997 | 0.825 | 0.930 | 0.342  |
|       | 2+ ICDs                            | 4309 | 1310       | 11883 | 179211 | 0.266                 | 0.993 | 0.767 | 0.938 | 0.427  |
|       | 3+ ICDs                            | 2260 | 523        | 13932 | 179998 | 0.140                 | 0.997 | 0.812 | 0.928 | 0.318  |

TP: true positive; FP: false positive; FN: false negative; TN: true negative; Sen: sensitivity; Spec: specificity; PPV: positive predictive value; NPV: negative predictive value;  $\phi$ : phi coefficient (mean square contingency coefficient).

270  
 271 We identified infection episodes nationwide, with SARS-CoV-2 and influenza virus  
 272 demonstrating the broadest US coverage. While episodes generally matched the *All of Us* EHR  
 273 subgroup distribution (Figure S1C), incorporating ICD codes and medications exhibited higher  
 274 infection rates in the Southeast and Texas despite lower testing coverage in these regions  
 275 (Figure 3). Temporally, episodes composed of 1-3 ICD codes showed seasonality patterns  
 276 consistent with test-positive episodes for all frequently detected viruses (Figure 4). During the  
 277 early COVID-19 pandemic (winter 2020 to spring 2021), only SARS-CoV-2 and RV were  
 278 consistently identified.

279

## 280 **Patterns in Phenotype Composition by Level of Care**

281 Encounter level of care varied by virus and episode composition. For RV, hMPV, PIV, hCoV,  
282 and SARS-CoV-2, episodes defined by at least one test without ICD codes were the most  
283 frequent, while for RSV, ADV, and influenza virus, ICD-only episodes predominated (Figure 5).  
284 Influenza virus episodes with antiviral prescriptions showed a similar distribution of visit types  
285 compared to those without, while SARS-CoV-2 episodes rarely included prescriptions during our  
286 study period.

287

288 By percentage, influenza virus and SARS-CoV-2 episodes showed a mix of outpatient, ER, and  
289 inpatient encounters, while other viruses demonstrated higher rates of ER visits and  
290 hospitalization. Episodes containing a positive test consistently showed higher rates of  
291 hospitalization compared to test-negative episodes. Similarly, hospitalization rates increased as  
292 the number of ICD codes within an episode increased. The cohorts included very few post-acute  
293 care encounters and almost no urgent care encounters.

294

## 295 **Laboratory Result Comparison**

296 Using national epidemiological data from NREVSS, COVID Data Tracker, and GISRS, we  
297 compared *All of Us* laboratory results by geographic coverage, virus type proportion, and  
298 temporal trends.

299

300 We found broad US coverage of *All of Us* participants with relevant EHR data (265,222  
301 participants), with enriched sampling near population centers in the Northeast megalopolis;  
302 Western Pennsylvania; Great Lakes Region; Southeast; Arizona; California; and the  
303 metropolitan areas of Austin/Dallas, Kansas City, Denver, and Seattle (Figure S1A, Table S7).  
304 Only 3.7% of zip3 codes had no *All of Us* participants with ICD, laboratory, or medication data.

305

306 Testing patterns in the *All of Us* data overlapped with CDC clinical laboratories reporting to  
307 NREVSS (Figure S1B) and mirrored participant distribution (Figure S1A) with a notable  
308 decrease in testing for all respiratory viruses in the Southeast relative to participant density  
309 (Figure S1C). Testing frequency varied substantially by virus; participants were more frequently  
310 tested for influenza virus and SARS-CoV-2 compared to all other viruses.

311

312 Virus type distributions in *All of Us* were similar to national surveillance data from NREVSS and  
313 GISRS.<sup>29–31</sup> For PIV (2011-2019), HPIV-3 was most commonly detected and all other types  
314 were less frequent (Figure S2A). For hCoV (2014-2021), OC43 was most common and 229E  
315 was least common, while the order of NL63 and HKU1 differed (Figure S2B). Influenza virus  
316 type proportions (2010-2020) were nearly identical, with influenza virus A more common than  
317 influenza virus B (Figure S2C). Cross-dataset influenza subtype comparisons were not  
318 available, but in *All of Us*, H3N2 and H1N1 pdm09 were markedly more common than H1N1  
319 and H5N1, as expected.

320

321 Test positivity patterns from 2017 to 2022 matched CDC rates for most viruses (mean absolute  
322 error 5.89 percent positive tests per week for RV and 1.18-2.82 for all other viruses) (Figure 6).  
323 SARS-CoV-2, influenza virus, and RV showed the highest percent positivity, and most viruses  
324 showed expected seasonal patterns: PIV and RV exhibited two seasonal peaks per year  
325 (spring-dominant for PIV, fall-dominant for RV), while RSV, influenza, and hMPV demonstrated  
326 single overlapping winter peaks. SARS-CoV-2 positivity matched expected variant waves (*e.g.*,  
327 Alpha, Delta, and Omicron BA.1). Notable differences in the *All of Us* data include more  
328 variability in RSV tests and positivity, undercounted positivity by ~10% during peak respiratory  
329 season for influenza and RSV, and less ADV positivity, relative to CDC data.

330

## 331 **DISCUSSION**

332 This study demonstrates that combining virus-specific EHR data elements reliably identifies  
333 respiratory viral infections in large biobank datasets. Using temporal, geographic, and sensitivity  
334 analyses, we described important performance insights into respiratory virus phenotyping. All  
335 phenotypes exhibited high specificity, though trade-offs exist between accuracy and sensitivity  
336 for influenza virus and SARS-CoV-2.

337  
338 We identified epidemiological patterns and cohort sizes that matched national surveillance data.  
339 The combination of laboratory results, ICD codes, and medications increased case detection  
340 beyond what any component alone could identify, which was valuable where laboratory testing  
341 was less frequent (e.g., the Southeast). The cohorts varied in size: approximately 20,000-  
342 30,000 episodes for influenza virus and SARS-CoV-2 compared to 200-1,600 for other viruses,  
343 likely reflecting increased clinical suspicion and testing for common pathogens rather than true  
344 differences in disease burden.<sup>15</sup> These cohorts could be used to investigate host genetic  
345 factors, health disparities, geographic and environmental risk factors, and clinical outcomes  
346 across respiratory viral infections. The longitudinal available also supports study of lifestyle  
347 factors through wearables and patient-reported outcomes from surveys.

348  
349 Phenotype performance varied substantially between viruses, across episode composition, and  
350 over time. Virus-specific ICD code sensitivity varied widely: higher for influenza (66.8% vs. 38-  
351 95% in published studies) and RSV (55.2% vs. 24%) and moderate for SARS-CoV-2, ADV,  
352 hMPV, and hCoV (33-44%), but very low for PIV (8.3% vs. 14% and RV (9.2% vs. 0%).<sup>18,19,34-36</sup>  
353 While non-influenza, non-SARS-CoV-2 virus-specific ICD codes showed high PPV regardless of  
354 count (89.7-97.3%), single ICD codes for SARS-CoV-2 and influenza were less predictive (68.8-  
355 69.7%).<sup>18,19,35,36</sup> For medication-inclusive cases, ICD codes had a higher PPV for influenza virus  
356 and SARS-CoV-2 episodes, and for SARS-CoV-2, antivirals alone were highly predictive of test

357 results, although receipt of remdesivir, molnupiravir or nirmatrelvir was rare (4.57% of all  
358 episodes) during the study period.

359  
360 The COVID-19 pandemic disrupted the seasonal transmission of most respiratory viruses,  
361 granting the opportunity to assess ICD code performance in unexpected settings and  
362 demonstrating the importance of evaluating code performance over time for seasonally variable  
363 diseases. hCoV ICD codes were inappropriately used to identify concern for COVID-19  
364 infection, with diminished but persistent effects throughout the study period. Apart from  
365 rhinovirus, our phenotypes only rarely identified false positive episodes during the COVID-19  
366 pandemic, mostly attributable to influenza virus episodes composed of a single ICD code. We  
367 suspect that these episodes reflect clinical concern for infection rather than true infection, and  
368 indeed, adjusting the influenza phenotype from any ICD code or medication to 2+ ICD codes or  
369 medications accompanied by an ICD code markedly reduced false positives and increased  
370 PPV. In this work, we suggest choosing phenotype characteristics that match the research  
371 question and desire to maximize sensitivity vs. PPV.

372  
373 Level-of-care analyses revealed patterns suggesting systematic detection biases toward higher  
374 acuity settings. Our phenotype identified a high frequency of infections at emergency and  
375 inpatient visits for RV, hMPV, RSV, ADV, PIV, and hCoV, compared to more outpatient visit  
376 types for SARS-CoV-2 and influenza virus. These findings differ from established hospitalization  
377 rates: CDC estimates suggest that only 1-2% of medically-attended influenza cases require  
378 hospitalization, while COVID-19 hospitalization rates ranged between 2.1% and 68% over this  
379 study period, with temporal trends showing a decrease from ~50% in the early pandemic to 20%  
380 by July, 2022.<sup>37-41</sup> Moreover, prospective studies in adults have shown that other respiratory  
381 viruses show either similar or lower hospitalization rates compared to influenza - the opposite of  
382 our results.<sup>4,16</sup> This discordance suggests that the *All of Us* computable phenotype oversamples



383 high levels of care, particularly for non-influenza, non-SARS-CoV-2 viruses, likely due at least  
384 three factors: the lack of cost-effective outpatient assays, an absence of specific therapeutic  
385 interventions that would justify multiplex testing costs in lower-acuity care settings, and the utility  
386 of identifying an etiology in the inpatient setting, where cessation of antibiotics or discharge are  
387 considerations.

388  
389 Several limitations affect the interpretation and generalizability of these findings. The low  
390 sensitivity for all viruses indicates that this method cannot be used to study disease prevalence,  
391 as nonspecific syndromic coding likely predominates for upper respiratory illnesses.

392 Additionally, the requirement for data conversion to a common data model before release in  
393 curated data repositories means this method cannot support real-time surveillance. In addition,  
394 while *All of Us* provides broad national coverage, it highly sampled some states (AZ, MA, WI,  
395 AL, PA, IL, MI, NY, MS, CA) and left approximately half the US population sampled below rates  
396 of 1 in 10,000. The program's intentional oversampling of populations historically  
397 underrepresented in biomedical research, while invaluable to health equity research, also  
398 results in demographics that differ from the overall US population. Other known impediments to  
399 generalizability compared to the US population include decreased representation of blind and  
400 deaf participants; difficulty in linking EHRs from a considerable portion of *All of Us* participants;  
401 and the decreased representation of persons of Asian, Middle Eastern or North African, and  
402 Native Hawaiian or Other Pacific Islander heritage in this cohort.<sup>42</sup>

403  
404 Finally, this work faces challenges common to EHR-based research. These include labeling  
405 bias, implicit clinician biases which could be influenced by demographics, and informed  
406 presence bias where EHR inclusion typically reflects illness rather than routine care.<sup>43,44</sup> The  
407 minimal representation of urgent care and post-acute care in our data further underscore the

408 disconnected nature of healthcare in the US, and identifies a likely gap in infection detection in  
409 this cohort.

410  
411 Despite these limitations, our computable phenotypes reliably detected geographic and  
412 temporal patterns of infection matching national surveillance, although severe infections are  
413 oversampled and many mild infections are likely missed. This work supports a need for  
414 expanded surveillance of non-influenza/non-SARS-CoV-2 pathogens in routine medical care.<sup>45</sup>  
415 Using a cohort that is expected to continually grow, our results enable future studies of genetic  
416 susceptibility and clinical outcomes research across both well-studied and understudied  
417 respiratory viruses. This work serves as a foundation for the creation and validation of other  
418 computable phenotypes for episodic infectious diseases using EHR-based methods.

419

## 420 **DATA AND CODE AVAILABILITY**

421 The Community Workspace “Respiratory Virus Computable Phenotype” is available for all  
422 approved *All of Us* users and includes all code and data used in this work

423 ([https://workbench.researchallofus.org/workspaces/aou-rw-](https://workbench.researchallofus.org/workspaces/aou-rw-ae307fda/respiratoryviralinfectionsinallofus/analysis)  
424 [ae307fda/respiratoryviralinfectionsinallofus/analysis](https://workbench.researchallofus.org/workspaces/aou-rw-ae307fda/respiratoryviralinfectionsinallofus/analysis)).

425

## 426 **ACKNOWLEDGEMENTS**

427 S Olsen and A Winn (CDC) kindly provided percent positivity data and locations of CDC clinical  
428 labs reporting to NREVSS. This work received an exception to the Data and Statistics  
429 Dissemination Policy from the *All of Us* Resource Access Board for figures 4 and 5. The primary  
430 author acknowledges the use of Claude (Anthropic) in the generation and revision of code to  
431 produce this computable phenotype, and in the revisions of this manuscript.

432

433 The contents of this publication are the sole responsibility of the authors. The content of this  
434 publication does not necessarily reflect the views, opinions, or policies of the NIH, the  
435 Uniformed Services University of the Health Sciences, the US Department of Health and Human  
436 Services, the US Department of Defense, or the US Government, nor does mention of trade  
437 names, commercial products, or organizations imply endorsement by the US government. This  
438 work was prepared by a military or civilian employee of the US Government as part of the  
439 individual's official duties. Therefore, it is in the public domain and does not possess copyright  
440 protection. Public domain information may be freely distributed and copied; however, as a  
441 courtesy, it is requested that the authors be given an appropriate acknowledgement.

442  
443 This work was supported by the National Human Genome Research Program Intramural  
444 Research Program, grant numbers: ZIA HG200417, ZIC HG200420; and the Division of  
445 Intramural Research of the National Institute of Allergy and Infectious Diseases. The All of Us  
446 Research Program is supported by the National Institutes of Health, Office of the Director:  
447 Regional Medical Centers: 1 OT2 OD026549; 1 OT2 OD026554; 1 OT2 OD026557; 1 OT2  
448 OD026556; 1 OT2 OD026550; 1 OT2 OD 026552; 1 OT2 OD026553; 1 OT2 OD026548; 1 OT2  
449 OD026551; 1 OT2 OD026555; IAA #: AOD 16037; Federally Qualified Health Centers: HHSN  
450 263201600085U; Data and Research Center: 5 U2C OD023196; Biobank: 1 U24 OD023121;  
451 The Participant Center: U24 OD023176; Participant Technology Systems Center: 1 U24  
452 OD023163; Communications and Engagement: 3 OT2 OD023205; 3 OT2 OD023206; and  
453 Community Partners: 1 OT2 OD025277; 3 OT2 OD025315; 1 OT2 OD025337; 1 OT2  
454 OD025276. Funders played no role in study design, data collection, analysis and interpretation  
455 of data, or the writing of this manuscript.

456

457 **AUTHOR CONTRIBUTIONS**

458 BJW and JCD conceived of the study design. BJW constructed the phenotype, conducted all  
459 analyses, and drafted the manuscript. TCT and HM contributed foundational data analysis  
460 support. FABC and EER offered appraisal of data analysis and early revision of the manuscript.  
461 All authors contributed to the final revision of the manuscript.

462

463 **COMPETING INTERESTS**

464 All authors declare no financial or non-financial competing interests.

465

466 **FIGURES AND FIGURE LEGENDS**

**a Phenotype Definition**

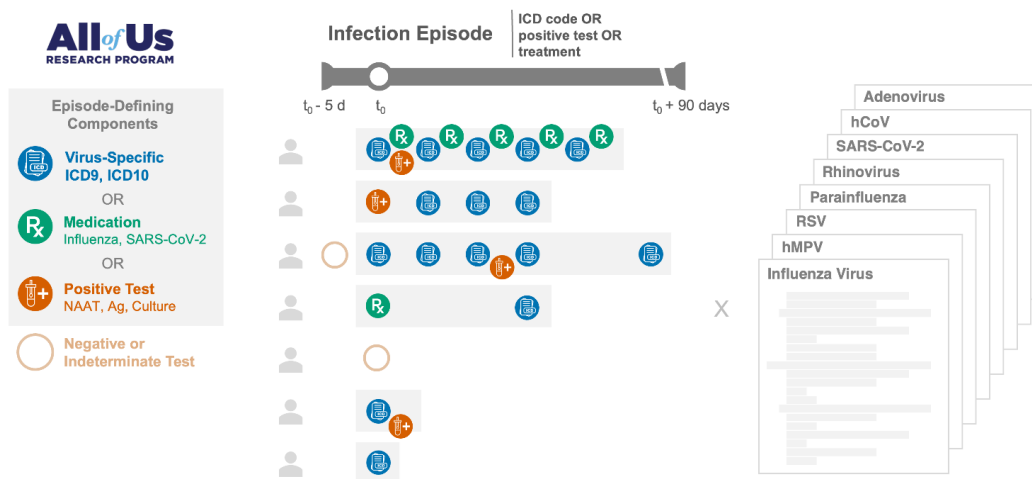

**b Episode Proportion by Component**

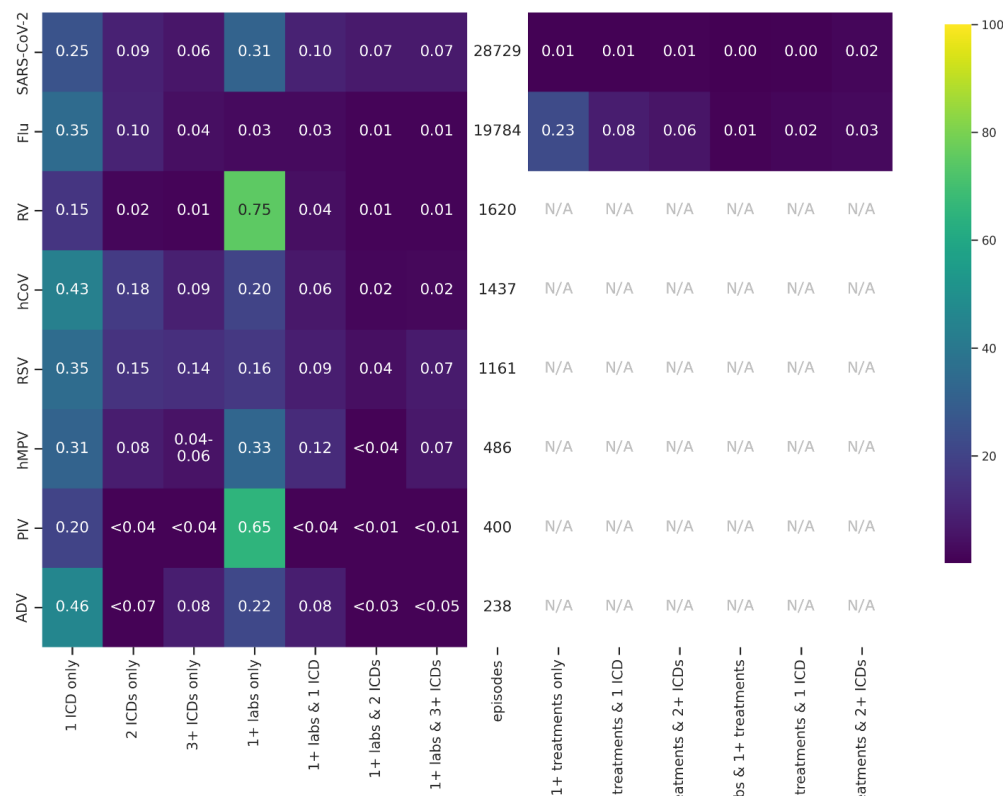

467

468 **Figure 1.** Computational phenotype for respiratory virus episodes using electronic health  
 469 records (EHRs) with respiratory episode composition. A: Episodes were defined by (1) virus-  
 470 specific ICD-9-CM or ICD-10-CM codes, (2) antiviral medications (for influenza and SARS-CoV-

471 2), and/or (3) positive laboratory results including nucleic acid amplification tests (NAAT),  
472 antigen tests, or cultures. The first qualifying event is designated as time zero ( $t_0$ ), and all  
473 related, subsequent events within 90 days were grouped into the same episode. Negative or  
474 indeterminate tests were also included, with a five-day lookback window to incorporate false  
475 negative results. Phenotypes were computed for influenza, human metapneumovirus (hMPV),  
476 respiratory syncytial virus (RSV), parainfluenza, rhinovirus (RV), SARS-CoV-2, common human  
477 coronavirus (hCoV), and adenovirus (ADV). Heatmap (B) showing the breakdown of episode  
478 types (columns) for each virus (row). Colors indicate the percentage of counts for each virus  
479 (e.g., 74.9% of RV episodes (1,210/1,620) contained only positive laboratory results.  
480 Percentage and corresponding color for counts below 20 (with a second count to prevent back-  
481 calculation for hMPV), were censored per the *All of Us* participant privacy policy. N/A : not  
482 applicable.  
483

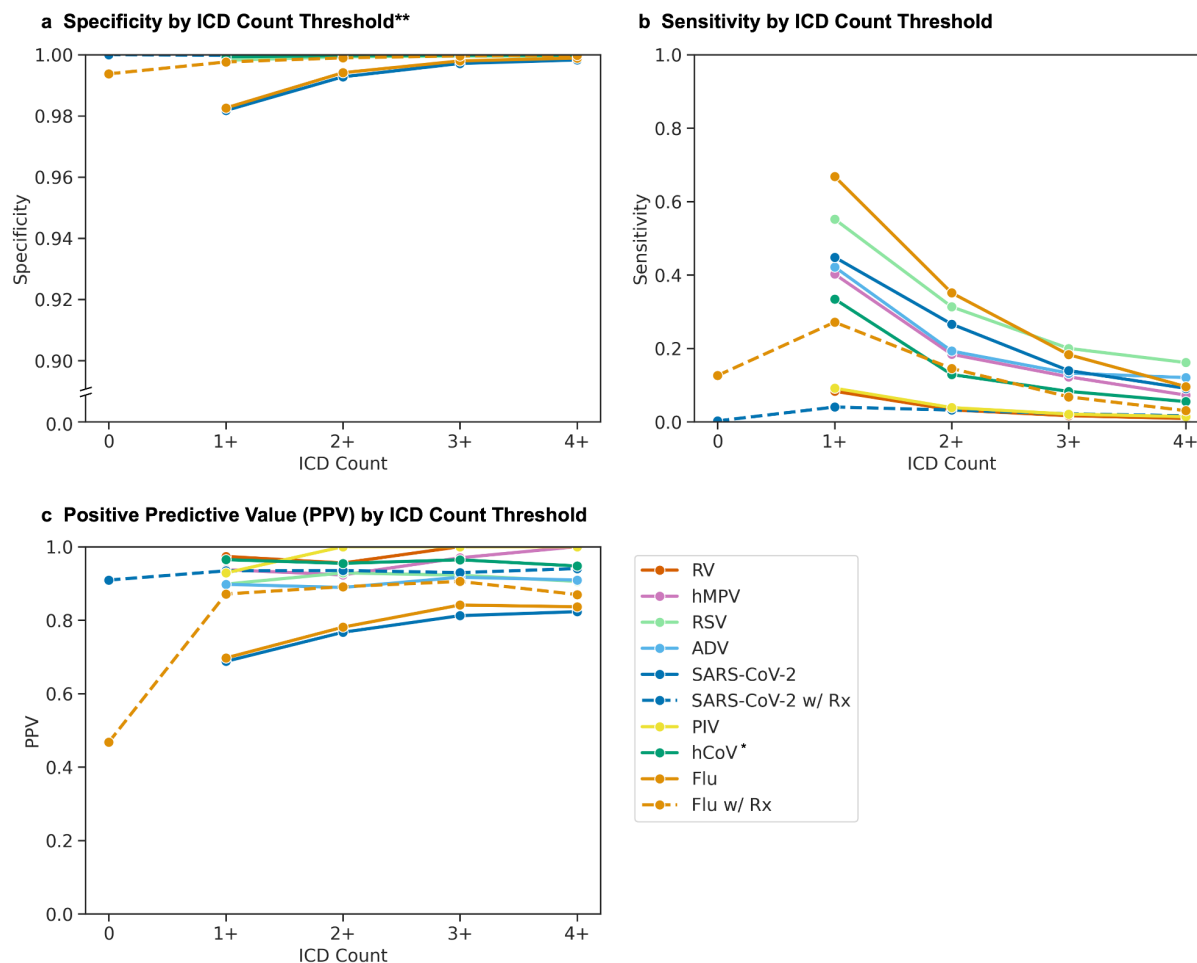

484  
 485 **Figure 2.** Phenotype performance across different episode definitions. Specificity (A), sensitivity  
 486 (B), and PPV (C) were calculated using non-antigen laboratory results as the reference  
 487 standard. For each virus, colored lines show performance across episodes containing  
 488 increasing numbers of ICD codes. For influenza virus (dashed orange line) and SARS-CoV-2  
 489 (dashed dark blue line), additional lines show performance when episodes were restricted to  
 490 episodes containing both ICD codes and antiviral prescriptions (Rx). \*Human coronavirus  
 491 (hCoV) episodes excluded ICD codes after February 1, 2020, due to loss of specificity during  
 492 the COVID-19 pandemic (Figure S3A). \*\*Y-axis for specificity (A) is broken to depict differences  
 493 near 1.0. PIV: parainfluenza; hMPV: human metapneumovirus; RV: rhinovirus; ADV:  
 494 adenovirus; RSV: respiratory syncytial virus; hCoV: human coronavirus; Flu: influenza virus.

**a All of Us Participants with Diagnosis, Drug, or Lab Result**

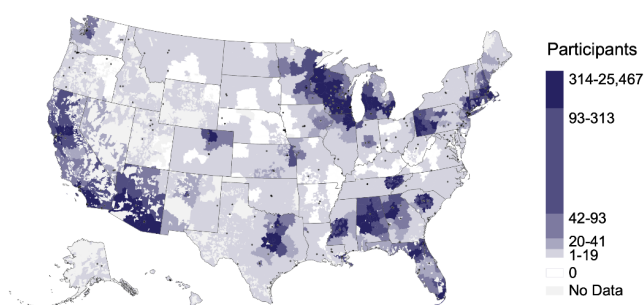

**b All of Us Respiratory Infection Episodes (per 1000 Participants)**

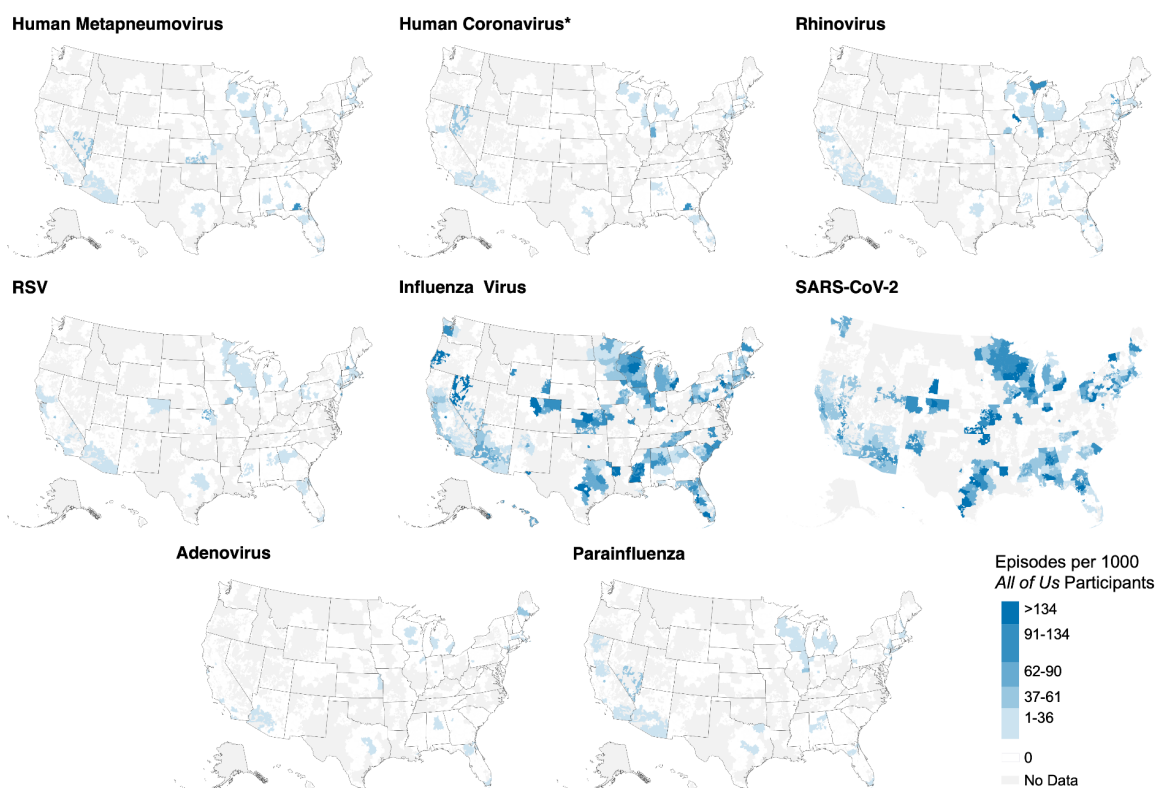

495  
496 **Figure 3.** Geographic distribution of respiratory virus episodes. Heat maps show episode rates  
497 per 1,000 *All of Us* participants with EHR data by three-digit zip code prefix. Colors represent  
498 quintiles defined by SARS-CoV-2 rates, the largest cohort. Regions with five or fewer *All of Us*  
499 participants are marked as "No Data" in (B). \*Human coronavirus episodes were filtered as  
500 described in methods. RSV: respiratory syncytial virus.  
501



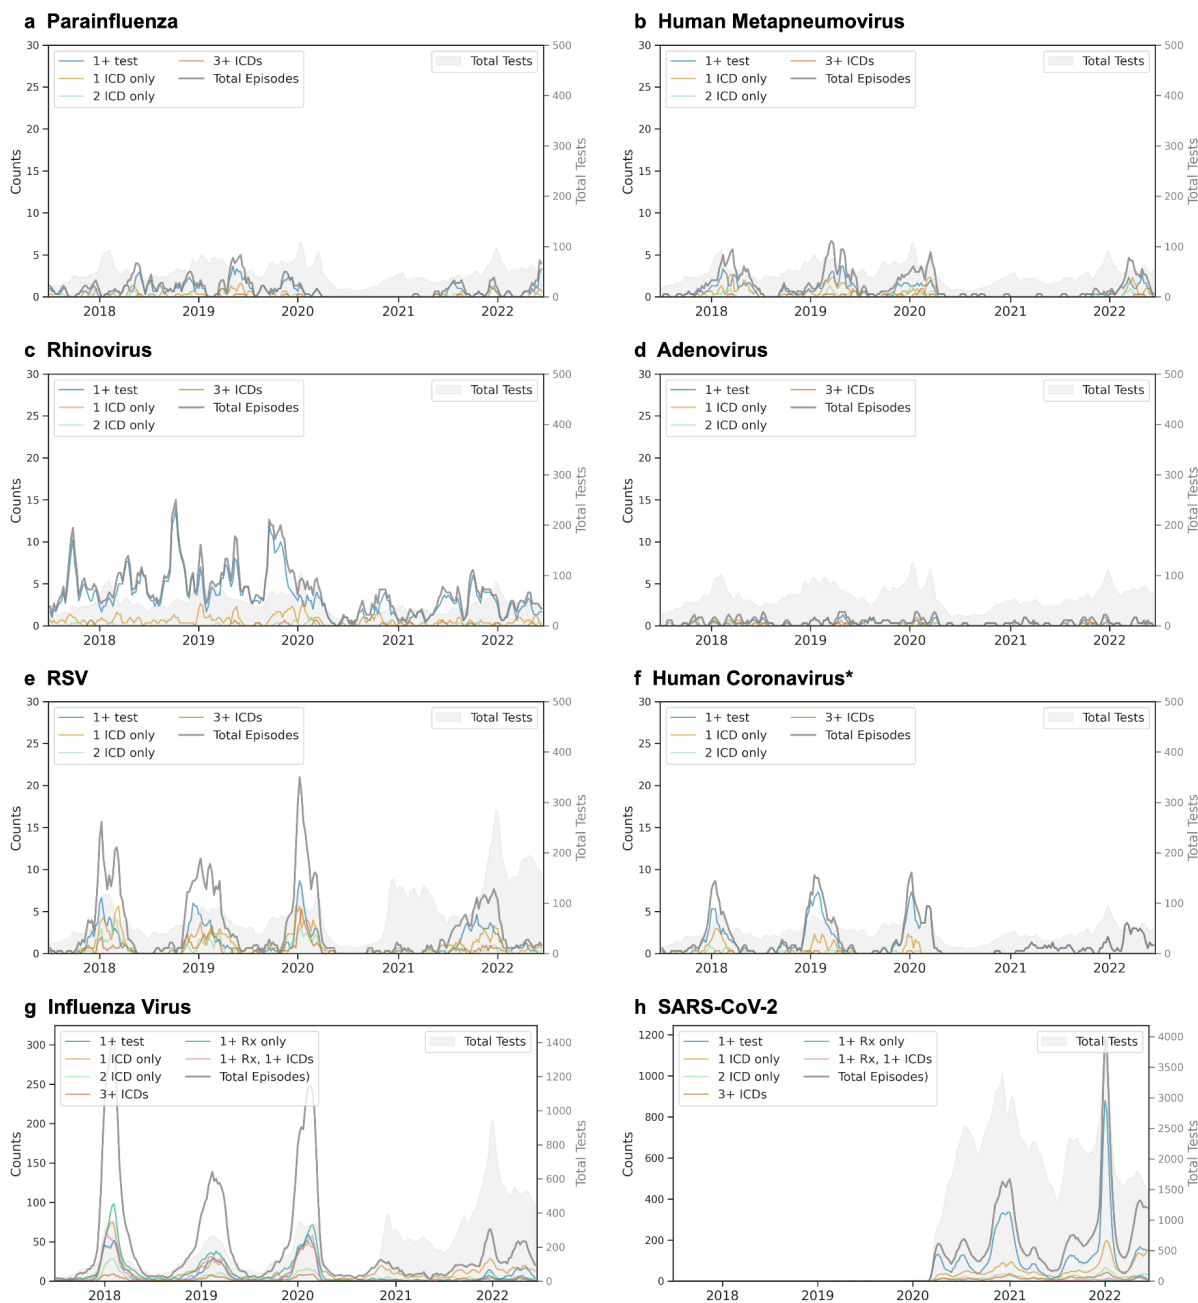

502  
 503 **Figure 4.** Temporal patterns of respiratory virus episodes by composition. Three-week moving  
 504 averages shown for (A) parainfluenza, (B) human metapneumovirus, (C) rhinovirus, (D)  
 505 adenovirus, (E) respiratory syncytial virus (RSV), (F) human coronavirus, (G) influenza virus,  
 506 and (H) SARS-CoV-2. For each virus, lines show total episodes (gray) and episodes by  
 507 composition: one or more positive tests (blue), single ICD code (light orange), two ICD codes

508 (light green), and three or more ICD codes (red-orange). For influenza, and SARS-CoV-2,  
509 additional lines show episodes with antiviral prescriptions alone (dark green) or with concurrent  
510 ICD codes (pink). Gray shading indicates testing volume. Left y-axis corresponds to episode  
511 counts; right y-axis shows total tests performed. \*Episodes for hCoV are shown after applying  
512 temporal filtering (unfiltered plot compared in [Figure S3](#)).  
513

**a Visit Type Count by Virus and ICD Code Count**

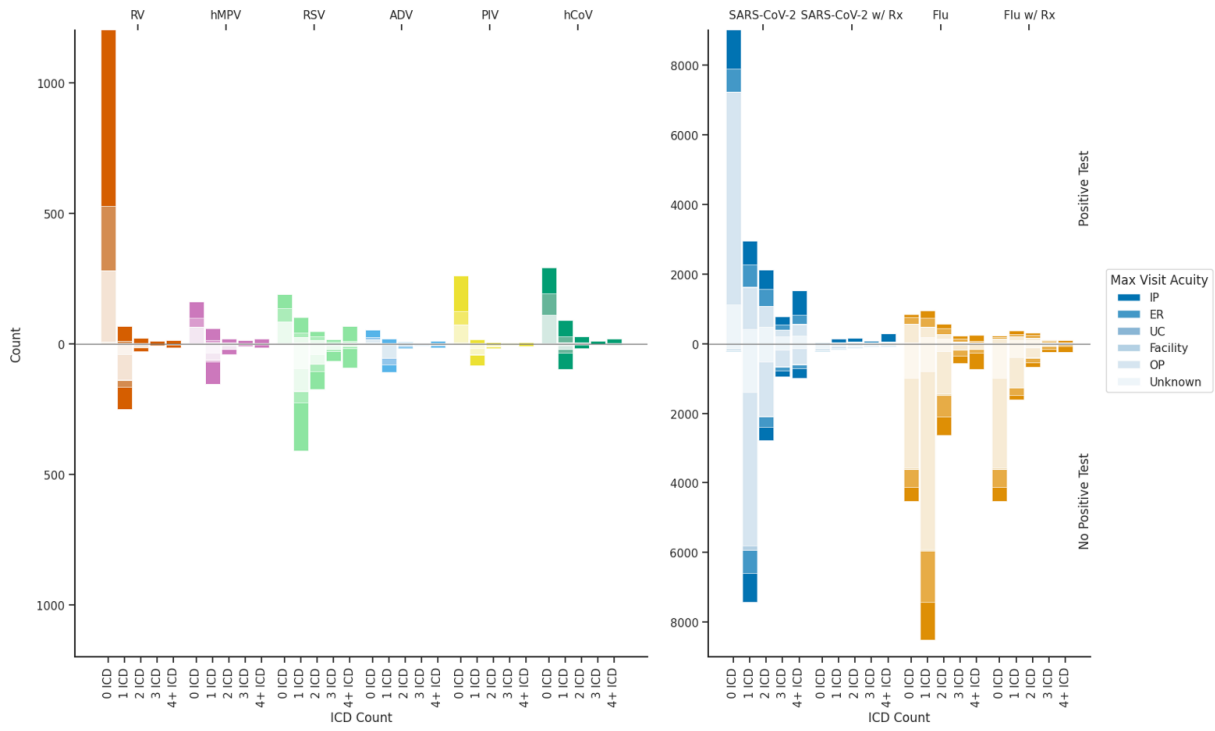

**b Visit Type Percentage by Virus and ICD Code Count**

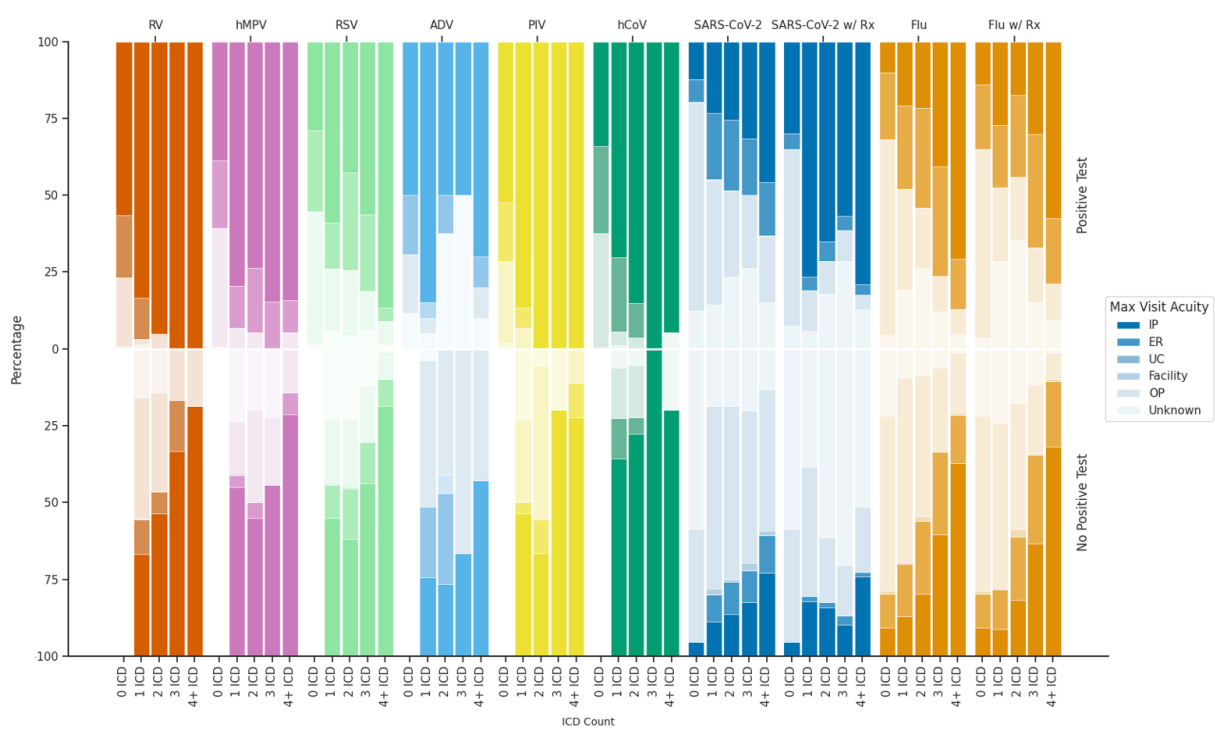

515 **Figure 5.** Level of care patterns by virus and episode composition. For each virus, (A) counts  
516 and (B) percentages of maximum level of care recorded between seven days before and 14  
517 days after episode start. Results are stratified by episode characteristics: episodes with positive  
518 tests (upper panels) versus those without (lower panels), and by number of ICD codes  
519 (columns). Color intensity corresponds to level of care: inpatient (IP, darkest), emergency room  
520 (ER), urgent care (UC), outpatient (OP), and unknown (lightest). For influenza virus (Flu) and  
521 SARS-CoV-2, additional columns show episodes containing antiviral prescriptions. PIV:  
522 parainfluenza; hMPV: human metapneumovirus; RV: rhinovirus; ADV: adenovirus; RSV:  
523 respiratory syncytial virus; hCoV: human coronavirus; Rx: antiviral prescription.  
524

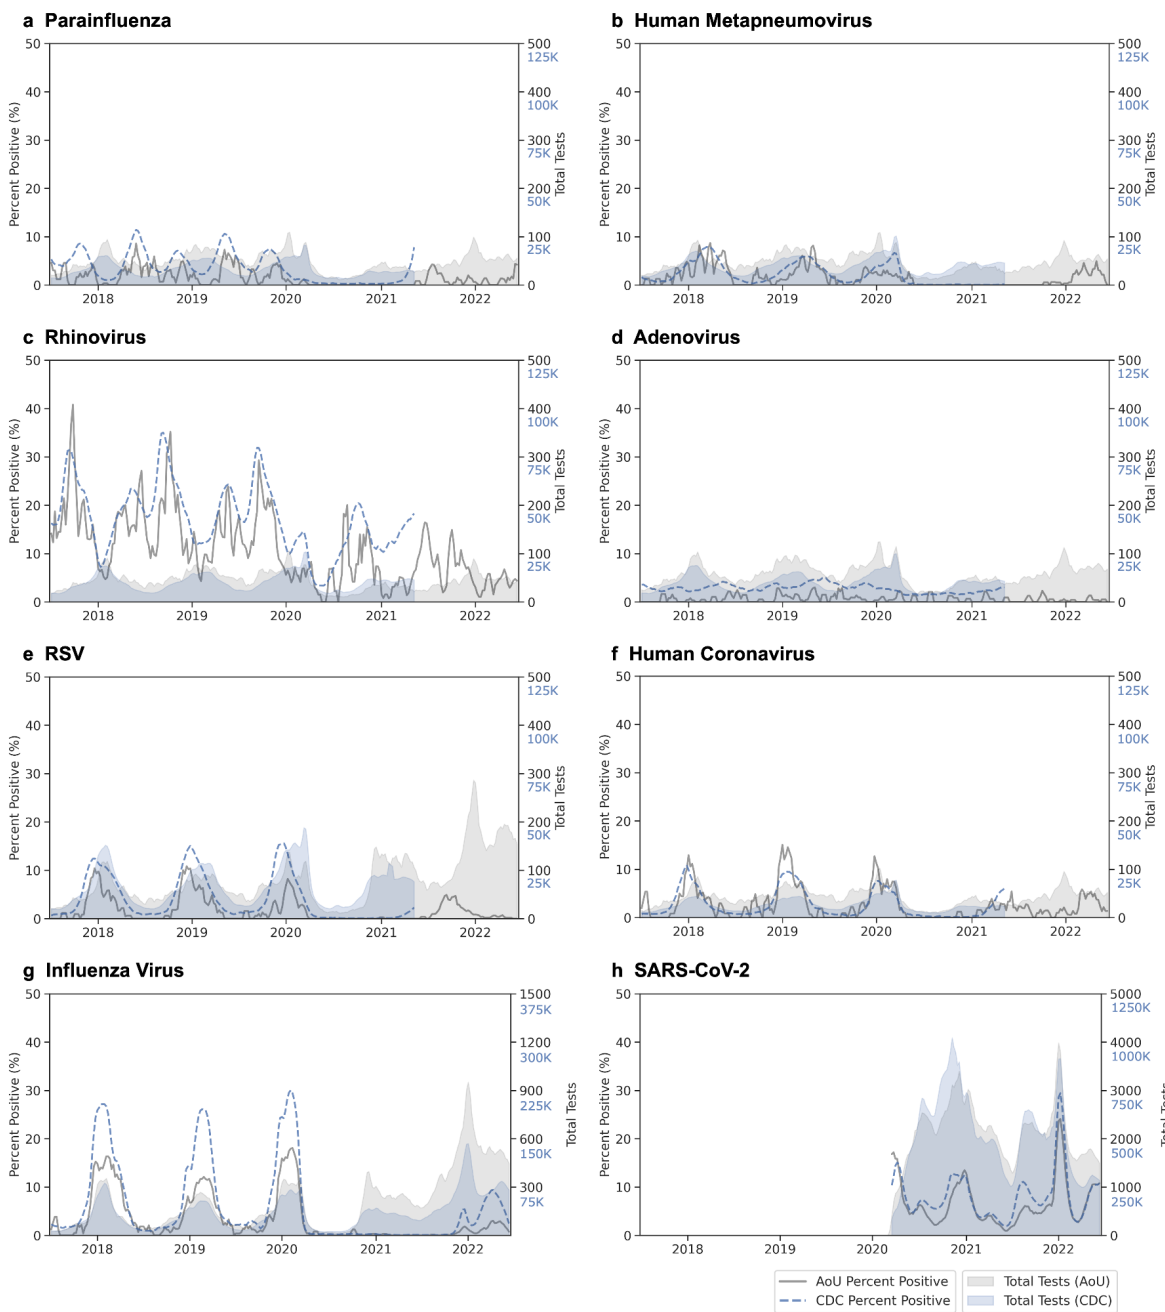

525  
 526 **Figure 6.** Temporal validation of test positivity using CDC surveillance data. Three-week moving  
 527 average of test positivity and test volume comparing *All of Us* (gray) to CDC surveillance data  
 528 (blue) for eight respiratory viruses: (A) parainfluenza, (B) human metapneumovirus, (C)  
 529 rhinovirus, (D) adenovirus, (E) respiratory syncytial virus (RSV), (F) common human  
 530 coronavirus (hCoV), (G) influenza virus, and (H) SARS-CoV-2. In each case, percent positivity

531 (lines) corresponds to the left y-axis and total tests performed (shaded areas) corresponds to  
532 the right y-axis. CDC data were obtained from NREVSS for panels A-F (ending 2021), FluView  
533 for influenza virus, and COVID Data Tracker for SARS-CoV-2. AoU: *All of Us*.

534

## 535 REFERENCES

536 1. Clementi, N. et al. Viral Respiratory Pathogens and Lung Injury. *Clin. Microbiol. Rev.*  
537 222, 563–569 (2019).

538 3. Boon, H., Meinders, A., Hannen, E. J. van, Tersmette, M. & Schaftenaar, E.  
539 Comparative analysis of mortality in patients admitted with an infection with influenza  
540 A/B virus, respiratory syncytial virus, rhinovirus, metapneumovirus or SARS-CoV-2.  
541 *Influ. Other Respir. Viruses* 18, e13237 (2024).

542 4. Lee, N. et al. Burden of noninfluenza respiratory viral infections in adults admitted to  
543 hospital: analysis of a multiyear Canadian surveillance cohort from 2 centres. *CMAJ*  
544 193, E439–E446 (2021).

545 5. Korsten, K. et al. Burden of respiratory syncytial virus infection in community-dwelling  
546 older adults in Europe (RESCEU): an international prospective cohort study. *Eur.*  
547 *Respir. J.* 57, 2002688 (2021).

548 6. DeMartino, J. K. et al. Respiratory Syncytial Virus–Related Complications and  
549 Healthcare Costs Among a Medicare-Insured Population in the United States. *Open*  
550 *Forum Infect. Dis.* 10, ofad203 (2023).

551 7. Chenchula, S. et al. Global prevalence and effect of comorbidities and smoking  
552 status on severity and mortality of COVID-19 in association with age and gender: a  
553 systematic review, meta-analysis and meta-regression. *Sci. Rep.* 13, 6415 (2023).

- 554 8. Andrew, M. K. et al. Age Differences in Comorbidities, Presenting Symptoms, and  
555 Outcomes of Influenza Illness Requiring Hospitalization: A Worldwide Perspective From  
556 the Global Influenza Hospital Surveillance Network. *Open Forum Infect. Dis.* 10,  
557 ofad244 (2023).
- 558 9. Lee, N. et al. IFITM3, TLR3, and CD55 Gene SNPs and Cumulative Genetic Risks for  
559 Severe Outcomes in Chinese Patients With H7N9/H1N1pdm09 Influenza. *J. Infect. Dis.*  
560 216, 97–104 (2017).
- 561 10. López-Rodríguez, M. et al. IFITM3 and severe influenza virus infection. No evidence  
562 of genetic association. *Eur. J. Clin. Microbiol. Infect. Dis.* 209, 1028–1031 (2014).
- 563 12. Yang, X. et al. Interferon-Inducible Transmembrane Protein 3 Genetic Variant  
564 rs12252 and Influenza Susceptibility and Severity: A Meta-Analysis. *PLoS ONE* 10,  
565 e0124985 (2015).
- 566 13. Initiative, C.-19 H. G. et al. A first update on mapping the human genetic  
567 architecture of COVID-19. *Nature* 608, E1–E10 (2022).
- 568 14. Kosmicki, J. A. et al. Genetic risk factors for COVID-19 and influenza are largely  
569 distinct. *Nat. Genet.* 1–5 (2024) doi:10.1038/s41588-024-01844-1.
- 570 15. Hedberg, P. et al. Clinical phenotypes and outcomes of SARS-CoV-2, influenza,  
571 RSV and seven other respiratory viruses: a retrospective study using complete hospital  
572 data. *Thorax* . 206, 56–62 (2012).
- 573 17. Buda, S., Tolksdorf, K., Schuler, E., Kuhlen, R. & Haas, W. Establishing an ICD-10  
574 code based SARI-surveillance in Germany – description of the system and first results  
575 from five recent influenza seasons. *BMC Public Heal.* 17, 612 (2017).
- 576 18. Cai, W. et al. Evaluation of using ICD-10 code data for respiratory syncytial virus

- 577 surveillance. *Influ. Other Respir. Viruses* 14, 630–637 (2020).
- 578 19. Hamilton, M. A. et al. Validating International Classification of Disease 10th Revision  
579 algorithms for identifying influenza and respiratory syncytial virus hospitalizations. *PLoS*  
580 *ONE* 16, e0244746 (2021).
- 581 20. Wei, W.-Q. et al. Combining billing codes, clinical notes, and medications from  
582 electronic health records provides superior phenotyping performance. *J. Am. Med.*  
583 *Inform. Assoc.* 23, e20–e27 (2016).
- 584 21. Fathima, S., Simmonds, K., Invik, J., Scott, A. N. & Drews, S. Use of laboratory and  
585 administrative data to understand the potential impact of human parainfluenza virus 4  
586 on cases of bronchiolitis, croup, and pneumonia in Alberta, Canada. *BMC Infect. Dis.*  
587 16, 402 (2016).
- 588 22. Cocoros, N. M. et al. Early Release - Electronic Health Record–Based Algorithm for  
589 Monitoring Respiratory Virus–Like Illness - Volume 30, Number 6—June 2024 -  
590 Emerging Infectious Diseases journal - *CDC. Emerg. Infect. Dis.* 30, 1096–1103 (2024).
- 591 23. Khera, R. et al. A multicenter evaluation of computable phenotyping approaches for  
592 SARS-CoV-2 infection and COVID-19 hospitalizations. *npj Digit. Med.* 5, 27 (2022).
- 593 24. Investigators, A. of U. R. P. et al. The “All of Us” Research Program. *N. Engl. J.*  
594 *Med.* 381, 668–676 (2019).
- 595 25. Office, A. of U. I. R. B. O. Not Human Subjects Research Determination: Research  
596 Hub: Controlled Tier Data Access Process for the All of Us Research Program. (2021).
- 597 26. Investigators, A. of U. R. P. All of Us Research Program Protocol. Preprint at  
598 [https://allofus.nih.gov/sites/default/files/AOU\\_Core\\_Protocol\\_Redacted\\_Dec\\_2021.pdf](https://allofus.nih.gov/sites/default/files/AOU_Core_Protocol_Redacted_Dec_2021.pdf)  
599 (2021).



- 600 27. Kotecha, D. et al. CODE-EHR best practice framework for the use of structured  
601 electronic healthcare records in clinical research. *BMJ* 378, e069048 (2022).
- 602 28. Olsen, S. J. et al. Changes in Influenza and Other Respiratory Virus Activity During  
603 the COVID-19 Pandemic — United States, 2020–2021. *Morb. Mortal. Wkly. Rep.* 70,  
604 1013–1019 (2021).
- 605 29. DeGroot, N. P. et al. Human parainfluenza virus circulation, United States, 2011–  
606 2019. *J. Clin. Virol.* 124, 104261 (2020).
- 607 30. Shah, M. M. et al. Seasonality of Common Human Coronaviruses, United States,  
608 2014–2021 - Volume 28, Number 10—October 2022 - Emerging Infectious Diseases  
609 journal - *CDC. Emerg. Infect. Dis.* 28, 1970–1976 (2022).
- 610 31. Malosh, R. E., McGovern, I. & Monto, A. S. Influenza During the 2010–2020 Decade  
611 in the United States: Seasonal Outbreaks and Vaccine Interventions. *Clin. Infect. Dis.*  
612 76, 540–549 (2022).
- 613 32. Prevention, C. for D. C. and. Influenza (flu) weekly U.S. influenza surveillance report  
614 (FluView). <https://gis.cdc.gov/grasp/fluview/fluportaldashboard.html>.
- 615 33. Prevention, C. for D. C. and. COVID Data Tracker. [https://covid.cdc.gov/covid-data-](https://covid.cdc.gov/covid-data-tracker/)  
616 [tracker/](https://covid.cdc.gov/covid-data-tracker/).
- 617 34. Higgins, T. L. et al. Assessment of the Accuracy of Using ICD-9 Diagnosis Codes to  
618 Identify Pneumonia Etiology in Patients Hospitalized With Pneumonia. *JAMA Netw.*  
619 *Open* 3, e207750 (2020).
- 620 35. Sivakumaran, S., Alsallakh, M. A., Lyons, R. A., Quint, J. K. & Davies, G. A.  
621 Estimating the contribution of respiratory pathogens to acute exacerbations of COPD  
622 using routine data. *J. Infect.* 86, 233–238 (2023).

- 623 36. Alchikh, M. et al. Are we missing respiratory viral infections in infants and children?  
624 Comparison of a hospital-based quality management system with standard of care. *Clin.*  
625 *Microbiol. Infect.* 25, 380.e9-380.e16 (2019).
- 626 37. Services, U. D. of H. and H. & CDC. CDC. Influenza (flu): Flu Burden.  
627 <https://www.cdc.gov/flu-burden/php/about/index.html> (2024).
- 628 38. Near, A. M., Tse, J., Young-Xu, Y., Hong, D. K. & Reyes, C. M. Burden of influenza  
629 hospitalization among high-risk groups in the United States. *BMC Heal. Serv. Res.* 22,  
630 1209 (2022).
- 631 39. Nikolla, D. A. et al. Defining Incidental Versus Non-incident COVID-19  
632 Hospitalizations. *Cureus* 16, e56546 (2024).
- 633 40. Vu, C. et al. A More Accurate Measurement of the Burden of Coronavirus Disease  
634 2019 Hospitalizations. *Open Forum Infect. Dis.* 9, ofac332 (2022).
- 635 41. Menachemi, N., Dixon, B. E., Wools-Kaloustian, K. K., Yiannoutsos, C. T. &  
636 Halverson, P. K. How Many SARS-CoV-2–Infected People Require Hospitalization?  
637 Using Random Sample Testing to Better Inform Preparedness Efforts. *J. Public Heal.*  
638 *Manag. Pr.* 27, 246–250 (2021).
- 639 42. V, C. L., Huebner, J., Hripcsak, G. & Sabatello, M. Underrepresentation of blind and  
640 deaf participants in the All of Us Research Program. *Nat. Med.* 29, 2742–2747 (2023).
- 641 43. Goldstein, B. A., Bhavsar, N. A., Phelan, M. & Pencina, M. J. Controlling for  
642 Informed Presence Bias Due to the Number of Health Encounters in an Electronic  
643 Health Record. *Am. J. Epidemiology* 184, 847–855 (2016).
- 644 44. Perets, O. et al. Inherent Bias in Electronic Health Records: A Scoping Review of  
645 Sources of Bias. *medRxiv* 2024.04.09.24305594 (2024)

646 doi:10.1101/2024.04.09.24305594.

647 45. Tang, J. W. et al. Global epidemiology of non-influenza RNA respiratory viruses:  
648 data gaps and a growing need for surveillance. *Lancet Infect. Dis.* 17, e320–e326  
649 (2017).
